# Supplementary material
Source: PubMed Central journal article supplement (PMC2942014)
Supplement: brc0004-0013-s01.pdf [file brc0004-0013-s01.pdf]

**Table 8.** Randomized clinical trials with glutathione, vitamin E, various antioxidants, and antioxidant combinations and chemotherapy (selection) [32]

| Trial/tumor type(s) [Ref.]                                                                                    | Patients, n                                     | Treatment protocol                                                                             | Chemotherapy regimen                                                                                                                                                                                    | Toxicity mitigation in treatment group vs. control group                                                                                                         | Responses in treatment group vs. control group                                                                                        | Conclusion                                                                                                                                                |
|---------------------------------------------------------------------------------------------------------------|-------------------------------------------------|------------------------------------------------------------------------------------------------|---------------------------------------------------------------------------------------------------------------------------------------------------------------------------------------------------------|------------------------------------------------------------------------------------------------------------------------------------------------------------------|---------------------------------------------------------------------------------------------------------------------------------------|-----------------------------------------------------------------------------------------------------------------------------------------------------------|
| <i>Glutathione (GSH)</i>                                                                                      |                                                 |                                                                                                |                                                                                                                                                                                                         |                                                                                                                                                                  |                                                                                                                                       |                                                                                                                                                           |
| Advanced colorectal cancer [58]                                                                               | n = 52; 26 chemo + GSH, 26 chemo + placebo      | 1,500 mg/m <sup>2</sup> given IV over 15 min, immediately before chemo                         | oxaliplatin 100 mg/m <sup>2</sup> as IV infusion, followed by 5-FU, 1,500 mg/m <sup>2</sup> as IV 24-h infusion with leucovorin, 150 mg/m <sup>2</sup> as infusion                                      | 30 vs. 100% in GSH vs. control group experienced grade 2–4 neurotoxicity (p = 0.004); incidence and severity of other toxicities were similar between the groups | CR + PR rates were 27 vs. 23% in GSH vs. control group; neither group reported a CR; median survival: 16 vs. 17 months                | GSH group experienced significantly reduced neuropathy vs. control group                                                                                  |
| Advanced ovarian cancer [59]                                                                                  | n = 54, 27 chemo + GSH, 27 chemo alone          | 2,500 mg/m <sup>2</sup> given IV over 15 min, immediately before chemo                         | CDDP 50 mg/m <sup>2</sup> as IV infusion in 26 patients; CDDP 75 mg/m <sup>2</sup> given IV in 28 patients                                                                                              | 26 vs. 50% experienced neurotoxicity; 37 vs. 78% experienced oliguria                                                                                            | CR + PR rates were 70 vs. 59%; CR rates were 22 and 11%; no survival rates reported; no statistical analysis due to small sample size | GSH group had less neurotoxicity and oliguria, and higher tumor response rates than control group                                                         |
| Gastric cancer [60]                                                                                           | n = 207                                         | 30 mg/kg given IV every day from start of chemo to discharge                                   | 5-FU prodrug (FT-207) 16 mg/kg/day IV until discharge, then 12 mg/kg/day orally for 24–36 months                                                                                                        | no significant difference in GI toxicities, higher serum 5-FU levels in GSH group                                                                                | similar survival rates                                                                                                                | GSH group had no differences in toxicity but significantly higher survival rates for stage III patients                                                   |
| <i>Vitamine E</i>                                                                                             |                                                 |                                                                                                |                                                                                                                                                                                                         |                                                                                                                                                                  |                                                                                                                                       |                                                                                                                                                           |
| Solid or non-myeloid malignancy [66]                                                                          | n = 32                                          | 300 mg/2× per day orally                                                                       | either 175 mg/m <sup>2</sup> IV paclitaxel plus carboplatin at an AUC of 6 on day 1, or 175 mg/m <sup>2</sup> IV paclitaxel plus 80 mg/m <sup>2</sup> epirubicin on day 1                               | neurotoxicity in 3/16 (18.7%) vitamin E patients vs. 10/16 (62.5%) in control (p = 0.03). PNP score vitamin E 2.25 vs. control 11 (p = 0.01)                     | n/a                                                                                                                                   | vitamin E protects from peripheral nerve damage                                                                                                           |
| Various malignant tumors (n): lung (15), HNC (5), ovarian (3), urethral (2), gastric (1), testicular (1) [30] | n = 27, 13 chemo + vitamin E vs. 14 chemo alone | 300 mg/day, alpha tocopherol orally before chemo; then continued. for 3 months after treatment | CDDP administered in varying doses and schedules based on specific tumor site, e.g., for lung cancer, 75 mg/m <sup>2</sup> IV on day 1 and GEM 1,000 mg/m <sup>2</sup> IV on days 1 and 8 every 3 weeks | 30.7 vs. 85.7% experienced neurotoxicity (p < 0.01); other toxicities were similar between the 2 groups                                                          | CR + PR rates were 62 vs. 73% (NS); CR rates and survival rates were not reported                                                     | vitamin E group had a significant reduction in severity and incidence of neurotoxicity; control group had higher tumor response rate than vitamin E group |
| Solid or nonmyeloid malignancy [61]                                                                           | n = 30 (completed; 40 enrolled)                 | 600 mg/day orally during chemo, and for 3 months after                                         | cisplatin-based therapy                                                                                                                                                                                 | neurotoxicity experienced in 3/14 (21.4%) vitamin E patients vs. 11/16 (68.5%) control; p = 0.026                                                                | n/a                                                                                                                                   | vitamin E may have important neuroprotective effects                                                                                                      |

**Table 8** (continued)

| Trial/tumor type(s) [Ref.]                                                                                           | Patients, n                                            | Treatment protocol                                                                                                                                     | Chemotherapy regimen                                                                                                                                          | Toxicity mitigation in treatment group vs. control group                                                                                                                                                             | Responses in treatment group vs. control group                                            | Conclusion                                                                                                                                                                                           |
|----------------------------------------------------------------------------------------------------------------------|--------------------------------------------------------|--------------------------------------------------------------------------------------------------------------------------------------------------------|---------------------------------------------------------------------------------------------------------------------------------------------------------------|----------------------------------------------------------------------------------------------------------------------------------------------------------------------------------------------------------------------|-------------------------------------------------------------------------------------------|------------------------------------------------------------------------------------------------------------------------------------------------------------------------------------------------------|
| <i>Antioxidants</i>                                                                                                  |                                                        |                                                                                                                                                        |                                                                                                                                                               |                                                                                                                                                                                                                      |                                                                                           |                                                                                                                                                                                                      |
| Various malignant tumors (n): testicular (16), osteosarcoma (13), GI (6), urogenital (5), HNC (5), melanoma (3) [62] | n = 48; 25 chemo + antioxidants vs. 23 chemo + placebo | oral vitamin C (1 g, L-ascorbic acid), vitamin E (400 mg, as dl-alpha tocopherol-acetate) and selenium (100 µg), all dissolved in milky white beverage | CDDP by IV in varying dose intensities (highest planned dose: 100 mg/m <sup>2</sup> ) each cycle 1–5 days of cytostatic drug infusions repeated every 21 days | no significant reduction in nephrotoxicity and ototoxicity, except in correlation analysis with respect to plasma antioxidant levels; also, more patients in antioxidant group received highest planned CDDP dosages | CR + PR rates were 44 vs. 48%; CR rates were 36 vs. 26%; survival rates were not reported | more patients in antioxidant arm were able to receive optimal doses of CDDP; response rates were similar between the 2 groups, however, CR rates were higher in antioxidant group than control group |
| Children with leukemia or non-Hodgkin's lymphoma [63]                                                                | n = 20                                                 | Co-Q10, 100 mg orally twice daily                                                                                                                      | anthracyclines (cumulative dose fixed at 240 mg/m <sup>2</sup> = 120 mg/m <sup>2</sup> IV daunorubicin and 120 mg/m <sup>2</sup> IV doxorubicin)              | Co-Q10 group had left ventricular fraction shorter than control                                                                                                                                                      | n/a                                                                                       | protective effect of Co-Q10 on cardiac function with anthracyclines                                                                                                                                  |
| Ovarian cancer [64]                                                                                                  | n = 62                                                 | selenium (200 µg/day) for study group in addition to orally taken mix of β-carotene, vitamin C, vitamin E, vitamin B2, vitamin B3, for both            | 100 mg/m <sup>2</sup> IV CDDP and 600 mg/m <sup>2</sup> IV cyclophosphamide                                                                                   | significant increase in WBC in selenium group (p < 0.001); significant decrease in all side effects, except diarrhea                                                                                                 | n/a                                                                                       | beneficial effects of selenium found when taken with chemo                                                                                                                                           |
| Cancer of digestive tract [65]                                                                                       | n = 60                                                 | oral selenium (200 µg/day) plus zinc (21 mg/day) for 50 days                                                                                           | 500 mg/m <sup>2</sup> IV MTX day 1, 250 mg/m <sup>2</sup> IV 5-FU day 2, and 600 mg/m <sup>2</sup> IV L-folinic acid day 2                                    | all patients malnourished at baseline. 21/30 (70%) selenium group showed no further decline but increase in appetite; 24/30 (80%) control had significant decline of all parameters (body weight, etc.) (p < 0.01)   | n/a                                                                                       | selenium plus zinc may improve general clinical course                                                                                                                                               |

chemo = Chemotherapy; IV = intravenously; CR = complete response (or complete remission); SD = stable disease; PR = partial response; NS = non-significant; n/a = not applicable; AUC = area under the curve; PPN = peripheral neuropathy score; NSCLC = non-small cell lung cancer; HNC = head and neck cancers; GI = gastrointestinal cancers; CML = chronic myelogenous leukemia; CDDP = cisplatin; VP-16 = etoposide; GEM = gemcitabine; DOX = doxorubicin; 5-FU = fluorouracil; FA = folinic acid (leucovorin); irinotecan = CPT-11; TAM = tamoxifen; MTX = methotrexate; Co-Q10 = coenzyme Q12.
